# Supplementary material
Source: PubMed Central journal article supplement (PMC2414308)

## SUPPORTING INFORMATION

The same primary structure of the prion protein yields two distinct self-propagating states

*Natallia Makarava and Ilia V. Baskakov\**

Medical Biotechnology Center, University of Maryland Biotechnology Institute,  
Baltimore, MD 21201, USA; Email: [Baskakov@umbi.umd.edu](mailto:Baskakov@umbi.umd.edu)

### Supplemental Figure Legends

**Suppl. Figure 1.** The height distribution for S- and R-fibrils as analyzed by AFM. The data were collected by an AFM operating in air, using tapping mode, by measuring the heights in cross-section of 100 fibrils of each type.

**Suppl. Figure 2.** Negative staining electron microscopy of the daughter fibrils produced in the seeded reactions. (a) The fibrillation reactions were seeded with S-fibrils (3%) and carried out under shaking (left panel) or rotation (right panel). (b) The fibrillation reactions were seeded with R-fibrils (3%) and carried out under rotation (left panel) or shaking (right panel). Scale bars = 0.2  $\mu\text{m}$ .

Suppl. Fig. 1

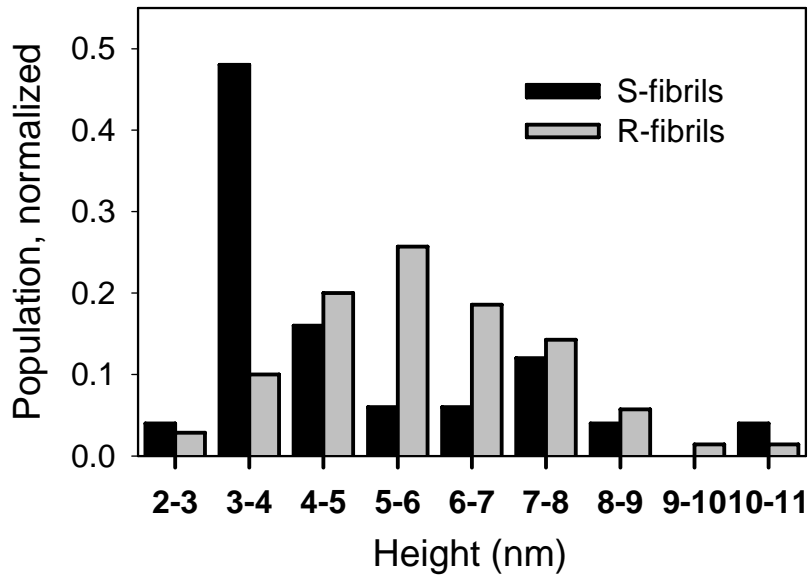

Suppl. Fig. 2

**a**

**PrP+S-fibrils, shaking**

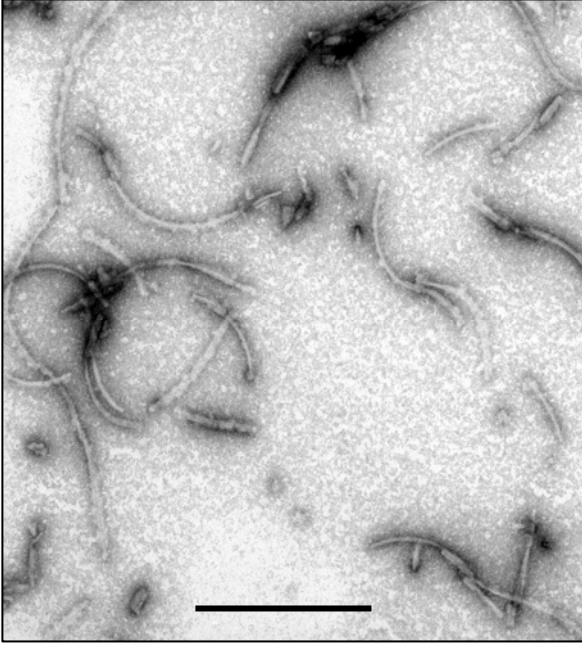

**PrP+S-fibrils, rotation**

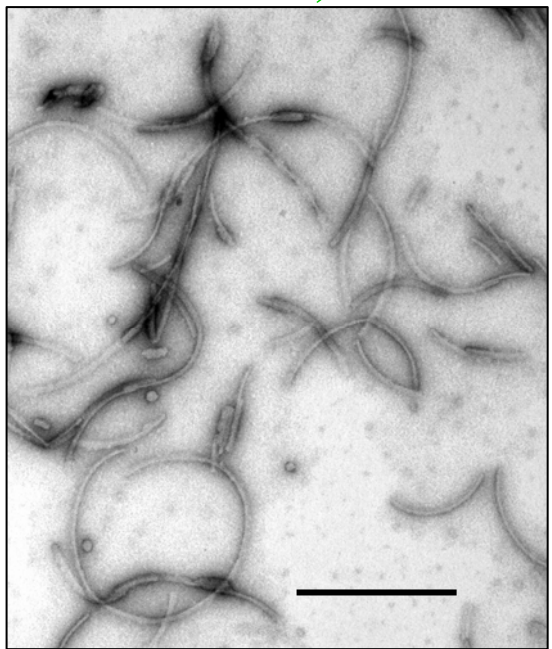

**b**

**PrP+R-fibrils, rotation**

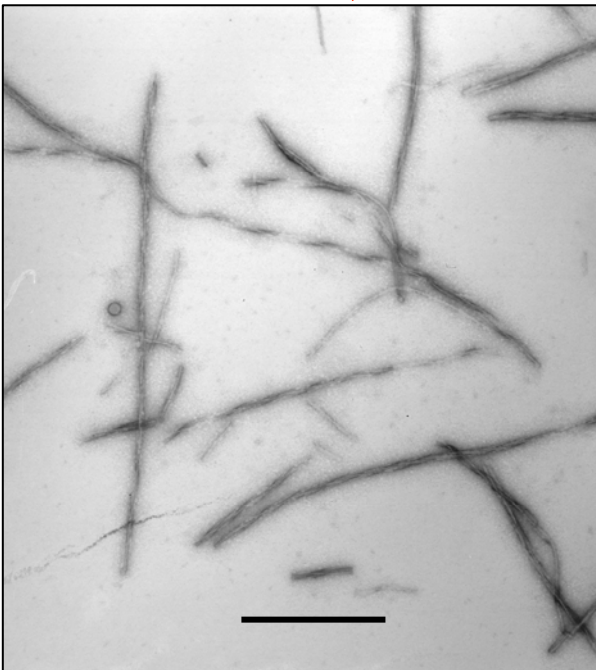

**PrP+R-fibrils, shaking**

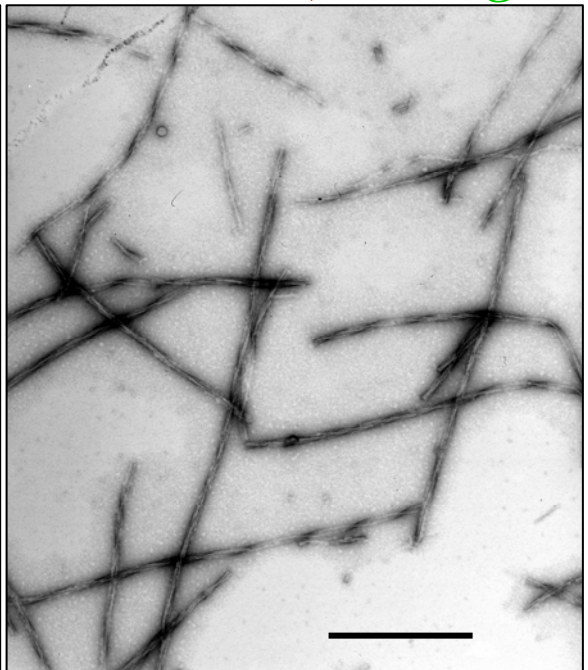

Supplement: supp_M800562200_JBC-Supporting_information-04-01-08.pdf [file supp_M800562200_JBC-Supporting_information-04-01-08.pdf]
